# The Effect of a Virtual No-Step Zone on Balance Control in Walking

Tyler Fettrow<sup>a,b,\*</sup>, Stephen DiBianca<sup>a</sup>, Fernando Vanderlinde dos Santos<sup>a,c</sup>, Hendrik Reimann<sup>a</sup>, John Jeka<sup>a</sup>

<sup>a</sup>Department of Kinesiology and Applied Physiology, University of Delaware, Newark, DE 19713, United States of America

<sup>b</sup>Department of Applied Kinesiology and Physiology, University of Florida, Gainesville, FL 32605, United States of America

<sup>c</sup>Bertec Corporation, Columbus, OH 43219, United States of America

---

## Abstract

Humans need to actively control their upright posture during walking to avoid loss of balance. We do not have a comprehensive theory for how humans regulate balance during walking, especially in complex environments. Balance must be maintained in a variety of contexts including crowded city side-walks, rocky nature trails, walks on the beach, or fast-paced sporting events. The nervous system must process many aspects of the environment to produce an appropriate motor output in order to maintain balance on two legs. We have previously identified three balance mechanisms that young healthy adults use to maintain balance while walking: 1) The ankle roll mechanism, a modulation of ankle inversion/eversion; 2) The foot placement mechanism, a shift of the swing foot placement; and 3) The push-off mechanism, a modulation of the ankle plantarflexion angle during double stance. We know that these mechanisms are interdependent and can be influenced by internal factors such as the phase of the gait cycle and walking cadence. Here we seek to determine whether there are changes in neural control of balance when walking in the presence of environmental constraints. Subjects walked on a self-paced treadmill while immersed in a virtual environment that provides three different colored pathways. Subjects were instructed not to step in the *No-Step Zone*, which appeared either on the right or left side of the subject. While walking, subjects received balance perturbations in the form of galvanic vestibular stimulation, providing the sensation of falling sideways, either toward the *No-Step* zone or toward the *Neutral* zone on the other side. The results indicate that the use of the balance mechanisms are subtly altered depending on whether the perceived fall

---

\*Corresponding Author: Tyler Fettrow (tfettrow@ufl.edu)

is toward the *No-Step* or the *Neutral* zone. This experiment provides further evidence that the balance control system during walking is extremely flexible, recruiting multiple mechanisms at different times in the gait cycle to adapt to environmental constraints.

---

## 11 **1. Introduction**

12 Human balance control has been extensively studied in standing (Winter et al., 1998; Kiemel  
13 et al., 2008; Peterka, 2002), but a comprehensive theory for how it is accomplished during  
14 walking is still not developed. Compared to standing, the gait cycle adds a layer of complexity to  
15 bipedal systems during locomotion. Balance while walking is further complicated in a dynamic  
16 and variable environment in walking compared to standing. Balance must be maintained in a  
17 variety of contexts, such as crowded city side-walks, rocky nature trails, walks on the beach, or  
18 fast-paced sporting events. How do environmental constraints contribute to the required motor  
19 output in order to maintain bipedal balance? Our interest here is to investigate a paradigm  
20 that systematically alters the use of the balance mechanisms during walking in response to  
21 constraints in the environment.

22 To our knowledge it is not understood how balance is achieved in the presence of environ-  
23 mental constraints. The majority of literature surrounding environmental constraints focuses on  
24 stepping (Rietdyk and Rhea, 2011) or steering around (Patla et al., 1991) an obstacle. These  
25 paradigms are valid representations of environmental constraints, as slipping and tripping com-  
26 bined account for an estimated 46% of falls among older adults (Leavy et al., 2015). If environ-  
27 mental constraints are imposed, we must adapt, and decide if falling in a certain direction has  
28 increased consequences or costs. Obviously any fall is undesirable, but certain types of falls  
29 may be more harmful, such as falling off a curb or a flight of steps.

30 A real-world situation that may alter the method of balance, although extreme and probably  
31 rare, could be walking along a narrow mountain foot-path with a 100m sheer cliff on the left  
32 side. A sudden gust of wind or a trip shifts the center of mass to the left. What does the  
33 nervous system do? A step to the left may be costly as this could shift the base of support to an  
34 unstable portion of the trail and result in a fall. In this example, we argue the nervous system  
35 must choose a specific balance response that reflects the cost of falling in a particular direction.

36 We know that the healthy human nervous system, without any environmental constraints,  
37 typically uses three major balance mechanisms (Reimann et al., 2018): 1) The ankle roll mech-  
38 anism, a modulation of ankle inversion/eversion that shifts the center of pressure under the  
39 stance foot towards the perceived fall, pulling the body in the opposite direction; 2) The foot  
40 placement mechanism, a shift of the swing foot placement towards the perceived fall that shifts  
41 the center of pressure towards the perceived fall after heel-strike; and 3) The push-off mecha-  
42 nism, a modulation of the ankle plantarflexion/dorsiflexion angle of the trailing leg, accelerating  
43 the CoM not only in the anterior-posterior direction, but also in the medial-lateral direction to  
44 correct the perceived fall. The nervous system combines these mechanisms in different ways  
45 to maintain balance, as the use of each mechanism varies on any given step (Fettrow et al.,  
46 2019b). Furthermore, the relative use of the mechanisms is altered based on internal con-  
47 straints, such as the phase of the gait cycle (Reimann et al., 2019), or the stepping cadence  
48 (Fettrow et al., 2019a). This allows for a highly flexible system that can meet the goal of main-  
49 taining balance during locomotion through a variety of scenarios.

50 Here we test whether the recruitment of the mechanisms depends on the perceived avail-  
51 ability of places to step in the environment. It is known that vision is used to assign constraints  
52 to the environment in which the person is navigating (Patla et al., 1991; Patla and Greig, 2006;  
53 Jansen et al., 2011) and for planning of future step location (Matthis and Fajen, 2014). We cre-  
54 ated a paradigm that attempts to recreate the cliff trail example, without the factor of fear. The  
55 literature has focused on the use of the foot placement mechanism in order to maintain balance  
56 (Townsend, 1985; Bruijn and Van Dieën, 2018). We know the foot placement is actively mod-  
57 ulated in response to a perceived fall (Hof and Duysens, 2013; Rankin et al., 2014; Reimann  
58 et al., 2017), and during normal walking (Wang and Srinivasan, 2014). If the foot placement  
59 mechanism is constrained, other mechanisms must be used in order to respond to a perceived  
60 threat to balance. We attempted to achieve this by placing "No Step Zones" lateral to the sub-  
61 ject's walking path, and periodically providing sensory perturbations to balance, providing the  
62 sensation of falling to the side, either toward the *No-Step* zone or the *Neutral* zone. We hy-  
63 pothesize that the foot placement mechanism will be restricted when the balance perturbation

64 produces a perceived fall towards the *No-Step* zone.

## 65 **2. Methods**

66 20 healthy young subjects (13 female,  $23.6 \pm 4.48$  years,  $1.68 \pm 0.096$  m,  $70.14 \pm 10.48$  kg)  
67 volunteered for the study. Subjects provided informed verbal and written consent to participate.  
68 Subjects did not have a history of neurological disorders or surgical procedures involving the  
69 legs, spine or head. The experiment was approved by the University of Delaware Institutional  
70 Review Board (IRB ID: 1339047-4).

### 71 *2.1. Experimental design*

72 Figure 1 shows the experimental setup, with subjects walking on a split-belt, instrumented  
73 treadmill (Bertec, Columbus, OH, USA, Figure 1A) within a virtual environment displayed via an  
74 Oculus Rift (Facebook Inc., Menlo Park, CA, USA, Figure 1B). The treadmill was self-paced,  
75 using a nonlinear PD-controller in Labview (National instruments Inc., Austin, TX, USA) to keep  
76 the middle of the posterior superior iliac spine markers on the mid-line of the treadmill. The  
77 head position in the virtual world was linked to the midpoint between the two markers on top  
78 of the Oculus headset, in which optic flow (forward motion) was defined by the treadmill speed.  
79 Rotation in the virtual world was updated via the IMU embedded in the Oculus. We adjusted  
80 yaw drift of the IMU through use of real-time rigid body 6DOF tracking of the head via Qualisys  
81 (Gothenburg, Sweden) motion capture software, according to the equation

$$\delta = \alpha(\beta - \gamma), \quad (1)$$

82 where  $\beta$  is the yaw angle of the head-mounted display rigid body from motion capture,  $\gamma$  the  
83 internal yaw angle of the Oculus IMU and  $\alpha$  a gain factor. This equation corrected the internal  
84 yaw angle of the Oculus system to the motion capture value by a small factor each time step,  
85 effectively tethering the Oculus perspective to the motion capture to remove long-term drift from  
86 gyroscope integration. The gain parameter was set to  $\alpha = 0.05$ .

87 The virtual environment was designed and implemented in Unity3d (Unity Technologies,  
88 San Francisco, CA, USA) and consisted of a tiled marble floor with floating cubes randomly

89 distributed in a volume 0-10 m above the floor, 2-17 m to each side from the midline, and  
90 infinitely into the distance providing peripheral visual depth and texture. On top of the marble  
91 floor was a pathway with three colored lanes of equal width. These three virtual lanes were  
92 aligned with the treadmill belts and, in combination, fully covered the width of the treadmill (1.10  
93 m, see Figure 1B). The middle lane was colored green. The left and right lanes alternated  
94 between gray and red, infinitely into the distance, each block with a length of 10 m. Instructions  
95 to the subjects were “Walk on the green path. Please do not step onto the red zones. It is ok  
96 to step onto the gray zones if you have to.” We will refer to the red areas as “No-Step” and the  
97 gray areas as “Neutral” zones.

98 After explaining the experiment, obtaining consent and placing markers and EMG sensors,  
99 subjects first walked for 15 minutes to adapt to the self-paced treadmill with the Oculus Rift.  
100 The instructions for starting the treadmill were to hold the handrail until the treadmill reached  
101 a comfortable pace, then let go and walk normally. During the adaptation we told the subjects  
102 that we would now perturb their sense of balance by use of the galvanic vestibular stimulation  
103 (GVS), and asked them to cope with this perturbation “normally” and keep walking forward.  
104 Data collection blocks consisted of alternating phases of metronome and stimulus. During  
105 metronome phases, lasting 30 s, we provided an auditory metronome at 100 bpm and asked  
106 subjects to use this as an “approximate guideline” for their footsteps, both during metronome  
107 and stimulus phases. During stimulus phases, lasting 120 s, we turned the metronome off, and  
108 subjects received intermittent balance perturbations (details below). Data were collected during  
109 stimulus phases. Each subject performed four blocks of walking, each block consisting of five  
110 metronome and five perturbed phases, always starting with metronome phases, for a total of  
111 12.5 min per block. After each block, the treadmill was turned off and subjects were offered a  
112 break. This protocol was implemented in a custom Labview program that sent the head position  
113 and treadmill speed to the Unity computer via UDP and saved the GVS current and treadmill  
114 speed at 100 Hz.

115 Forty-four reflective markers were placed on the subject, using the Plug-in Gait marker set  
116 (Davis III et al., 1991), with six additional markers on the anterior thigh, anterior tibia, and 5th

117 metatarsal of each foot. Marker positions were recorded at 200 Hz using a Qualisys motion  
118 capture system with 13 cameras. Ground reaction forces and moments were collected at 1000  
119 Hz from both sides of the split-belt treadmill and transformed into a common coordinate frame  
120 to calculate whole-body center of pressure (CoP).

121 The vestibular perturbations were triggered on heel-strikes of either foot. The direction of  
122 the fall, determined by the polarity of the current, was always chosen in the direction of the foot  
123 triggering the stimulus. We identified heel-strikes as the local maxima of forward progression  
124 of the heel marker. Due to the alternation of the zones in the outer lanes, this could provide a  
125 sensation of falling either towards a *No-Step* or towards a *Neutral* zone. We also included a  
126 sham condition with no stimulus as an unperturbed reference, and randomly chose each trigger  
127 to be GVS or sham, with equal likelihood. GVS Perturbations consisted of a 1 mA current  
128 passed between two round electrodes (3.2 cm diameter, Axelgaard Manufacturing 103 Co.,  
129 Ltd, Fallbrook, CA, USA) placed on the mastoid processes for 1 s, inducing a feeling of falling  
130 to the side. The perturbation could only be triggered in the middle third between a *No Step* and  
131 a *Neutral* zone to avoid possible confusion near the zone switch lines, and was randomized to  
132 trigger 1-4 steps after entering the valid inner area. To allow the effects of the perturbation to  
133 wash out, further triggers were blocked for at least 10 steps.

## 134 *2.2. Data analysis*

135 We low-pass filtered force plate data with a 4th order Butterworth filter at a cut-off frequency  
136 of 20 Hz and kinematic data with a 4th order Butterworth filter with a cutoff frequency of 10  
137 Hz. We calculated joint angle data from the marker data, based on a geometric model with 15  
138 segments (pelvis, torso, head, thighs, lower legs, feet, upper arms, forearms, hands) and 38  
139 degrees of freedom (DoF) in OpenSim (Delp et al., 2007; Seth et al., 2018) using an existing  
140 base model (Zajac et al., 1990). We calculated the body center of mass (CoM) trajectories  
141 based on this model. To normalize the EMG trajectories, we divided each signal by the average  
142 over all control strides for each channel and subject.

143 We normalized the data between heel-strikes to 100 time steps. To estimate the motor  
144 response to the perturbations, we subtracted the average of the unperturbed sham triggers

145 within each subject for all data. Thus all of results will be presented as a difference from control,  
146 referred to as a response.

147 To improve the estimate of the foot placement response to the stimulus, we fitted a linear  
148 regression model relating the foot placement changes for each subject to the changes of lateral  
149 position and velocity of the CoM at midstance using the control data (Wang and Srinivasan,  
150 2014). Then for each stimulus step, we used this model to estimate the expected foot placement  
151 change based on the CoM state, and subtracted this from the observed foot placement change,  
152 resulting in an estimate of the foot placement change due to the vestibular stimulus (Reimann  
153 et al., 2017). We will refer to this model-based estimate as model-corrected foot placement  
154 change.

155 The experimental design contains two distinct stimulus conditions, where each stimulus  
156 could induce a fall sensation either towards a *No-Step* zone or towards a *Neutral* zone. We  
157 will refer to these two conditions simply as *No-Step* or *Neutral* stimuli from here on. Spatially,  
158 the fall was always towards the triggering leg, which could be either the left or the right. After  
159 processing and filling gaps in the kinematic data, we were left with 1211 *No-Step* and 1207  
160 *Neutral* stimuli.

161 Subjects were able to successfully maintain balance while walking on the self-paced tread-  
162 mill, with no instances of stepping off the treadmill or making use of the body-weight support  
163 system. Occasionally subjects violated the task by stepping into the *No-Step* zone. Across all  
164 subjects, 64 such violations occurred during or after *No-Step* stimuli and 47 during or after *Neu-*  
165 *tral* stimuli. We removed these stretches of data from further analysis, which left 1147 *No-Step*  
166 and 1160 *Neutral* stimuli.

### 167 *2.3. Outcome Variables*

168 We expected that the effect of the vestibular perturbations would be different for fall stimuli  
169 toward *No-Step* zones compared to those toward *Neutral* zones. Our first hypothesis was that  
170 the whole-body CoM excursion would be larger for *No-Step* vs. *Neutral*. We further hypothe-  
171 sized that responses in the foot placement mechanism would be smaller, and responses in the  
172 ankle roll and push-off mechanism would be larger for *No-Step* vs. *Neutral*. Here we specify



173 main and secondary outcome variables we calculated to test these hypotheses statistically.

174 For the overall balance response, we used (i) the  $\Delta$  shift of the whole-body CoM at the end  
175 of the fourth step and (ii) the  $\Delta$  velocity at the end of the second post-stimulus step, based  
176 on previous results showing that the maximal changes are near these times (Reimann et al.,  
177 2018).

178 For the ankle roll mechanism, we analyzed four variables related to the stance leg lateral an-  
179 kle activation: (iii) the  $\Delta$  CoP-CoM distance integrated over the first post-stimulus single stance.  
180 (iv) the  $\Delta$  stance leg ankle eversion/inversion angle integrated over the first post-stimulus single  
181 stance. (v) the  $\Delta$  stance leg peroneus longus EMG integrated over the first post-stimulus single  
182 stance. (vi) the  $\Delta$  stance leg tibialis anterior EMG integrated over the first post-stimulus single  
183 stance.

184 For the foot placement mechanism, we analyzed five variables related to the first post-  
185 stimulus swing leg heel strike: (vii) the foot placement, defined as the  $\Delta$  swing leg heel position  
186 relative to the trigger leg heel position at swing leg heel strike. (viii) the model-corrected foot  
187 placement, defined as the difference between the measured foot placement value and the foot  
188 placement value predicted based on the position and velocity of the CoM at mid-stance using  
189 the linear model (see above). (ix) the  $\Delta$  trigger leg knee internal/external rotation angle at swing  
190 leg heel-strike. (x) the  $\Delta$  swing leg hip internal/external rotation angle at swing leg heel-strike.  
191 (xi) the  $\Delta$  swing leg hip abduction/adduction angle at swing leg heel-strike.

192 For the push-off mechanism, we analyzed two variables related to the push-off of the trailing  
193 leg before and during the second post-stimulus double stance: (xii) the  $\Delta$  plantarflexion angle  
194 integrated over the second post-stimulus double stance phase. (xiii) the  $\Delta$  medial gastrocne-  
195 mius EMG of the stance leg integrated over the first post-stimulus swing phase.

#### 196 *2.4. Statistical analysis*

197 We confirmed the assumptions of normality and homoscedasticity by visual inspection of  
198 the residual plots for the variables related to foot placement, lateral ankle, and pushoff mech-  
199 anisms. Our primary focus of analysis is the whole-body CoM shift and the kinematic, kinetic,  
200 and electromyographical variables associated with the ankle roll, foot placement and push-off



201 balance mechanisms.

202 To test our hypotheses about whether humans use the balance mechanisms differently  
203 across stimulus directions, we used R (R Core Team, 2013) and lme4 (Bates et al., 2009)  
204 to perform a linear mixed effects analysis. For each outcome variable, we fitted a linear mixed  
205 model and performed an ANOVA to analyze the use of the mechanisms and interaction of  
206 stimulus direction, using Satterthwaite's method (Fai and Cornelius, 1996) implemented in the  
207 R-package lmerTest (Kuznetsova, 2017). As fixed effects, we used the direction of the pertur-  
208 bation towards a *No-Step* or a *Neutral* zone. As random effects, we used individual intercepts  
209 for subjects. Table 1 displays the results for this statistical test on the outcome variables.

### 210 3. Results

211 Table 1 shows the results of the linear mixed model ANOVA. Statistically significant differ-  
212 ences between *No-Step* and *Neutral* are marked in bold.

213 We observed a whole-body balance response in both the *No-Step* and *Neutral* conditions.  
214 Figure 2A shows the effect of the balance response in the center of mass (CoM) shift in both  
215 conditions. The average CoM trajectories for the two conditions start to separate around the  
216 third post-stimulus step. As hypothesized, the effect of the perturbation is stronger in the *No-*  
217 *Step*. This difference is reflected in the CoM velocity results, shown in Figure 2B. Both of these  
218 differences are statistically significant (see Table 1).

219 Figure 3 shows the displacement of the CoP relative to the CoM. The CoP shifts in the  
220 direction of the perceived fall in both conditions, as expected. There appears to be no difference  
221 in the response to the perceived fall between the two conditions during the single stance period,  
222 though after the first post-stimulus heel-strike the average trajectories begin to diverge.

223 **Ankle Roll.** The shift of the CoP and CoM are generated by a temporally coordinated set  
224 of balance mechanisms. Due to the stimulus occurring on heel strike, the first available re-  
225 sponse is in the ankle roll mechanism. Figure 4 shows the kinematic and electromyographic  
226 response of the lateral ankle mechanism. Figure 4A displays a triggering leg inversion during  
227 the first post-stimulus step relative to the unperturbed pattern. The ankle inversion change

228 trends higher towards the end of single stance, but is not statistically different. Figure 4B dis-  
229 plays the peroneous longus muscle activity, an ankle everter, and Figure 4C displays the tibialis  
230 anterior, an ankle inverter. Together, the changes in activation of these two muscles provide  
231 evidence the lateral ankle mechanism is actively generated. A decrease in peroneous longus  
232 activity and an increase in tibialis anterior activity yield an ankle inversion.

233 **Foot Placement.** Figure 5A shows that the foot placement was used in both conditions,  
234 as evidenced by the shift of the average response in the direction of the perceived fall. The  
235 difference in foot placement response was not statistically significant between the *No-Step* and  
236 *Neutral* conditions (1). The better estimate of the model-corrected foot placement change, how-  
237 ever, shows a stronger difference between zone conditions that did reach statistical significance  
238 (Table 1), as seen in Figure 5B. Contrary to our expectation, the foot placement response to  
239 stimuli towards the *No-Step* zone was larger than the response to stimuli towards the *Neutral*  
240 zone, rather than smaller. Figure 6 shows the kinematic variables related to the foot place-  
241 ment. The the swing leg hip adducts, and internally rotates, and the trigger leg knee internally  
242 rotates, for both conditions. The combination of these three joint angle changes yield the foot  
243 placement change in the direction of the fall stimulus, displayed in Figure 6A. None of these  
244 kinematic measures are significantly different between conditions (Table 1).

245 **Push-off.** Figure 7 shows that the push-off mechanism was also used to respond to the  
246 balance perturbation, with an increased plantarflexion and increased medial gastrocnemius  
247 activity for both conditions. According to Table 1, the integrated plantarflexion angle change  
248 quantifying the kinematic resposne did not significantly differ between conditions, but the medial  
249 gastrocnemius activity did differ significantly, with more medial gastrocnemius activity in the *No-*  
250 *Step* condition.

## 251 4. Discussion

252 This experiment served as the first attempt in identifying how environmental constraints  
253 modify the use of the different balance mechanisms in walking. We expected virtual constraints  
254 would alter the use of the balance mechanisms. The virtual environment, shown in Figure 1B,

255 paired with instructions not to step onto the red *No-Step* zones, was used to determine if envi-  
256 ronmental constraints alter the use of the balance mechanisms. We found that this paradigm  
257 produced subtle changes in the balance mechanisms that led to a robust difference in the  
258 whole-body CoM displacement.

259 We observed a separation of the CoM movement in the third and fourth steps following the  
260 stimulus onset. There was more of an overall shift of the CoM when the balance perturbation  
261 was towards the *No-Step* zone compared to the *Neutral* zone. We expect the CoM shift to  
262 be a result of the use of the balance mechanisms. Although there were no strong differences  
263 between the zone conditions for any of the balance mechanisms, we observe subtle trends in  
264 each mechanism that are consistent between multiple variables associated with each balance  
265 mechanism.

266 The lateral ankle mechanism appears to be consistently larger in the *No-Step* condition, with  
267 larger ankle inversion, decreased peroneous muscle activity, and increased tibialis anterior ac-  
268 tivity, shown in Figure 4. Only the tibialis anterior muscle activity showed a significant difference  
269 between the *No-Step* and *Neutral* conditions, but in combination the evidence suggests that  
270 the ankle roll mechanism was activated to a greater extent when a perturbation induced a fall  
271 toward the *No-Step* zone. The foot placement mechanism also shows trends to support con-  
272 sistent use in the *towards No-Step Zone* condition, contrary to our hypothesis. Only the  
273 model corrected foot placement showed a significant difference between perturbation directions  
274 for evidence of a greater use of the foot placement mechanism. Regardless, this difference, in  
275 combination with the subtle trends of kinematics shown in figures 6 and Figure 5A, provide  
276 evidence to suggest increased use of the foot placement mechanism when the perturbation  
277 induces a fall toward the *No-Step* zone. The push-off provides less compelling evidence to  
278 suggest a difference between conditions, despite a difference in medial gastrocnemius activ-  
279 ity. Figure 7A shows a greater plantarflexion occurs in *Neutral* zone perturbations, but figure  
280 7B shows the muscle activity is trending lower relative to *No-Step* zone perturbations. The  
281 combination of the subtle differences in the lateral ankle and the foot placement mechanisms  
282 in the first step post-stimulus likely generate the CoM shift we observe in the third and fourth

283 steps post-stimulus. This is evidence that humans can indeed alter the mechanisms they use to  
284 maintain balance, particularly in the medial-lateral direction, based on perceived environmental  
285 constraints.

286 The modification of the balance response in the presence of an environmental constraint in-  
287 dicates substantial influence from central, supraspinal components. The balance response was  
288 altered, despite randomization of perturbation direction, suggesting a descending command  
289 that influences the execution of the balance response. However, unlike previous research re-  
290 garding supraspinal central sets in balance control (Horak et al., 1989), here we observe a  
291 direction dependent adjustment instead of amplitude or velocity. If a direction dependent cen-  
292 tral set were in place, a primed activation of the balance mechanisms can push the body further  
293 from the undesired location (*No-Step* zone). In general, the external constraint imposed leads  
294 to a cognitive bias that effects the response to the perturbation.

295 Despite the changes we see in the balance mechanisms dependent on the stimulus direc-  
296 tion, the observed foot placement response was contrary to our hypothesis. We expected a  
297 decreased foot placement response during *No-Step* stimuli, but instead observed an increased  
298 use of the foot placement mechanism. Multiple factors could contribute to this result: 1) the  
299 participants did not have great perception of their lower limbs while totally immersed in virtual  
300 reality, 2) the green pathway was wide enough to make a foot placement while still abiding by  
301 the rules of the task, or 3) the participants did not perceive the task as having a high degree  
302 of risk (i.e. no consequences for stepping in area). We discuss these factors and possible  
303 solutions in the following paragraphs.

304 We intentionally did not provide any visual or auditory feedback of whether the individual  
305 was completely adhering to the protocol (i.e. never stepping in the red pathway). We opted  
306 for a minimalist development with no avatar or audio feedback. It is arguable that the presence  
307 of a virtual avatar would help the perception of the participant's own body in space. Previous  
308 research has shown motor adaptation in upper limb experiments in the presence of an avatar  
309 (Bourdin et al., 2019). However, studies about gait kinematics are still needed to understand  
310 the specific components of virtual reality immersion and their possible benefits (Ferreira dos

311 Santos et al., 2015).

312 Future experiments should look to improve the perception or effect of the environmental  
313 constraint. In the example of walking along a cliff, the cost of not abiding by the constraints  
314 is high; a fall off the cliff. This urgency does not exist in the current paradigm. We avoided  
315 the confounding factor of fear by creating a mundane environment and provided instructions  
316 to simply avoid stepping on a particular color. Fear and anxiety are known to modify behavior  
317 (Raffageau et al., 2020) and spinal reflexes when exposed to increased heights (Sibley et al.,  
318 2007). Fear may be one method to provide an incentive to abide by such a constraint. Another  
319 strategy to improve the efficacy of the paradigm could be to narrow the path of normal walking  
320 or decrease the distance between the no-step zone and walking path. However, we would likely  
321 not want to constrain the path to the extent of narrow beam walking (Peterson and Ferris, 2018),  
322 as this form of walking entirely eliminates the ability to use the foot placement mechanism for  
323 the control of balance in the medial-lateral direction (Otten, 1999). It may also be possible to  
324 improve engagement through gamification of the task. Positive feedback for avoiding the no-  
325 step zone or negative feedback for stepping in the no-step zone may improve the engagement  
326 in this paradigm. Although virtual reality is still in its infancy, many researchers have attempted  
327 to modify behavior through virtual reality in neurological populations (Felsberg et al., 2019).  
328 Further, a handful of researchers are attempting to modify and improve walking performance  
329 through gamification (Eggenberger et al., 2016; Schättin et al., 2016; Adcock et al., 2020).

330 This knowledge and paradigm will be particularly helpful for individuals that suffer from an  
331 injury or condition that prevent the use of a specific balance mechanism. For example, people  
332 with diabetic neuropathy or Parkinson's disease might refrain from using the ankle roll mech-  
333 anism due to diminished proprioception. A paradigm similar to the one described here could  
334 be used to enhance the use of the ankle roll mechanism. We used vestibular stimulation to  
335 elicit balance responses, but similar elicitations could be provoked by mechanical perturbations  
336 (Banala et al., 2010; Acasio et al., 2017).

## 337 **5. Conclusion**

338 We created a task for walking in a virtual environment that can be used to study the effects  
339 of environmental constraints on the control of balance during locomotion. The results indicate  
340 that the neural control of balance changes in the presence of environmental constraints. More  
341 research is needed to refine the paradigm to determine how exactly the balance mechanisms  
342 change in the presence of environmental constraints. If we can predict which balance mech-  
343 anisms people will use in specific situations, we can use this to intervene in the automatic  
344 balance response through alteration of the environment. Such a paradigm may be an avenue  
345 to target and rehabilitate specific balance mechanisms and strategies.

Table 1: Results of the linear mixed model ANOVA. Bold face text indicates statistically significant differences between perturbations toward *No-Step* and *Neutral* zones. .

| Variable                            | Num. Df | Den. Df | F      | p               |
|-------------------------------------|---------|---------|--------|-----------------|
| $\Delta$ CoM                        | 1       | 1922.3  | 145.38 | < <b>0.0001</b> |
| $\Delta$ CoM Velocity               | 1       | 1921    | 31.105 | < <b>0.0001</b> |
| $\int \Delta$ CoP-CoM               | 1       | 1928.7  | 0.0946 | 0.7585          |
| $\int \Delta$ Ankle Eversion        | 1       | 1930.1  | 2.4456 | 0.118           |
| $\int \Delta$ Peroneuous Longus EMG | 1       | 1924.8  | 2.657  | 0.1033          |
| $\int \Delta$ Tibialis Anterior EMG | 1       | 1928.7  | 3.8821 | <b>0.04895</b>  |
| $\Delta$ Foot placement             | 1       | 1925.4  | 0.9193 | 0.3378          |
| Model-Correct Foot placement        | 1       | 1921.4  | 29.15  | < <b>0.0001</b> |
| $\Delta$ Knee Rotation              | 1       | 1924    | 0.0637 | 0.8008          |
| $\Delta$ Hip Rotation               | 1       | 1922.3  | 3.593  | 0.05817         |
| $\Delta$ Hip Adduction              | 1       | 1923.6  | 0.1343 | 0.714           |
| $\int \Delta$ Ankle Plantarflexion  | 1       | 1927    | 2.789  | 0.09508         |
| $\int \Delta$ Medial Gastroc EMG    | 1       | 1924.7  | 4.6848 | <b>0.03055</b>  |



Figure 1: (A) Subjects walked on a self-paced treadmill, wearing a head-mounted display, while harnessed to a body-weight support system (not shown). The front handrail was used to assist in starting and stopping the self-paced treadmill comfortably. (B) The virtual reality scene displayed in the Oculus Rift. Subjects were instructed to walk on the green pathway and avoid stepping in the red *No-Step* zones. If the subject needed to, they were able to step in the gray *Neutral* zones.

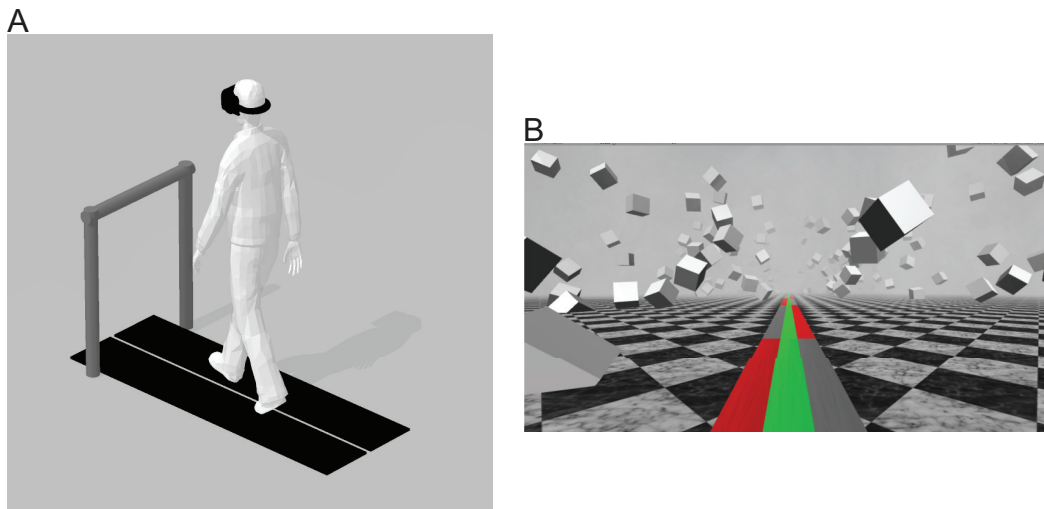

Figure 2: Changes in response to the balance perturbation in the medial-lateral CoM position (A) and velocity (B). Curves start at the heel-strike triggering the stimulus and span four steps, ending at heel-strike of the same foot. Red curves correspond to fall stimuli toward the *No-Step* and gray curves to fall stimuli toward the *Neutral* zone. The gray vertical bars correspond to double stance phases and the white areas in between to single stance phases. Data shown are changes relative to the unperturbed steps, with shaded areas around the means giving the 95% confidence intervals.

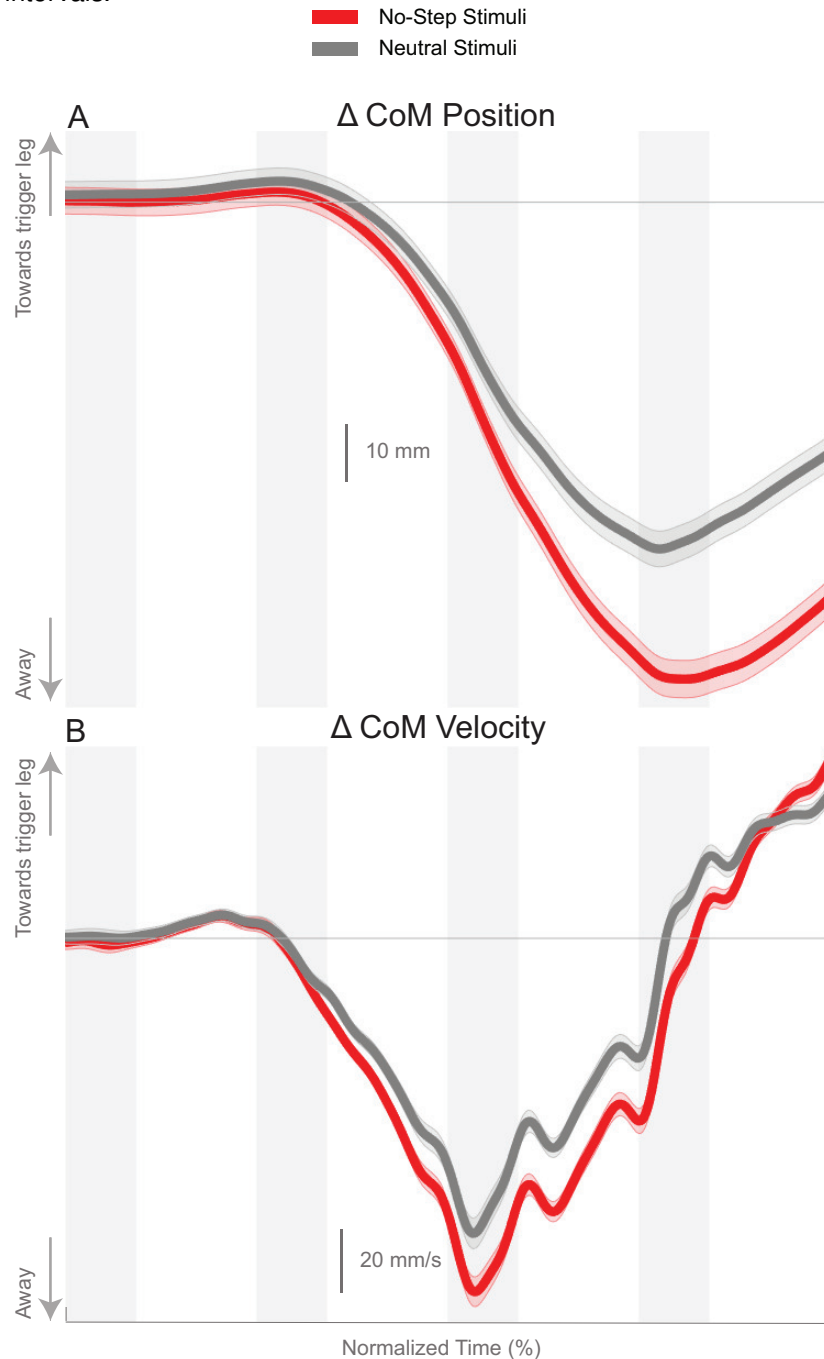

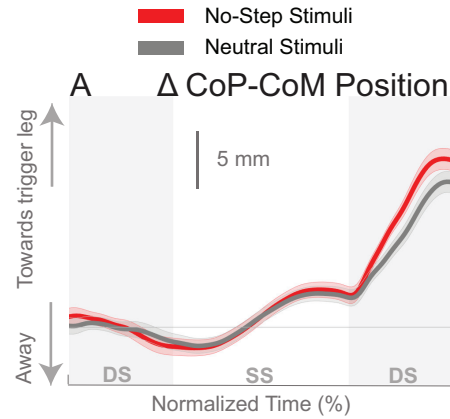

Figure 3: Changes in the medial-lateral CoP-CoM displacement in response to the perturbations. Curves start at the heel strike triggering the stimulus and end at the triggering foot toe-off. Red curves correspond to fall stimuli toward the *No-Step* and gray curves to fall stimuli toward the *Neutral* zone. The vertical shaded areas correspond to double stance, the white area between to single stance. Data shown are changes relative to the unperturbed steps, with shaded areas around the means giving the 95% confidence intervals.

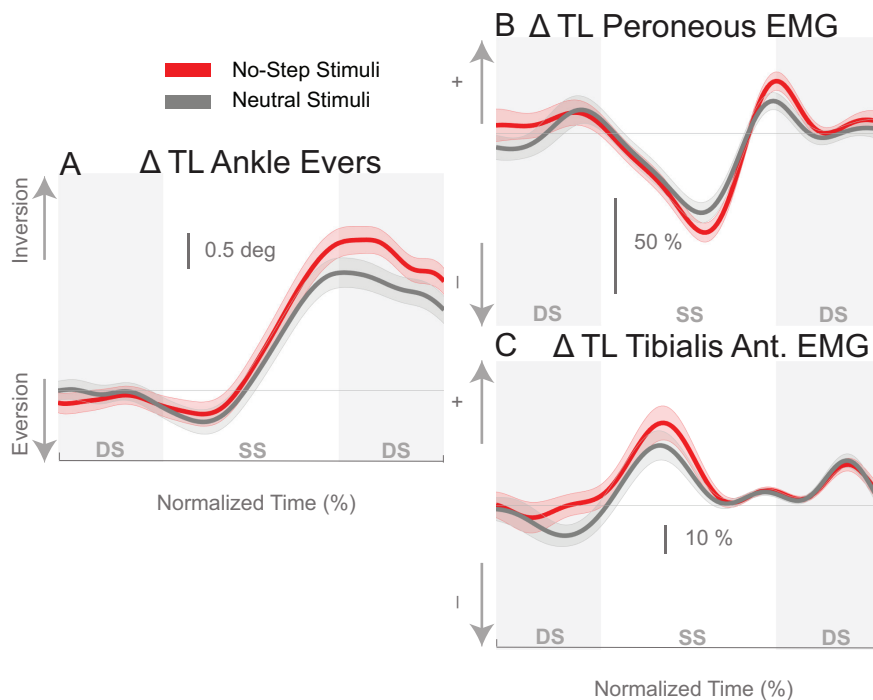

Figure 4: Variables illustrating the use of the lateral ankle mechanism. (A) The joint angle that contributes to the CoP-COM changes; and (B,C) the EMG that contributes to joint angle changes. Curves start at the heel strike triggering the stimulus and end at the triggering foot toe-off. Red curves correspond to fall stimuli toward the *No-Step* and gray curves to fall stimuli toward the *Neutral* zone. The vertical shaded areas correspond to double stance, the white area between to single stance. Data shown are changes relative to the unperturbed steps, with shaded areas around the means giving the 95% confidence intervals.

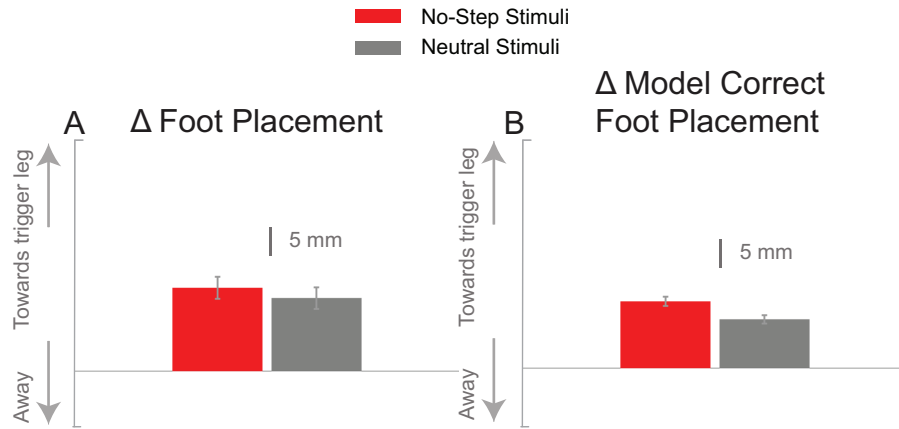

Figure 5: The foot placement response (A) and the model-corrected foot placement (B) at the first post-stimulus step. Bars indicate the mean and the errors the 95% confidence interval.

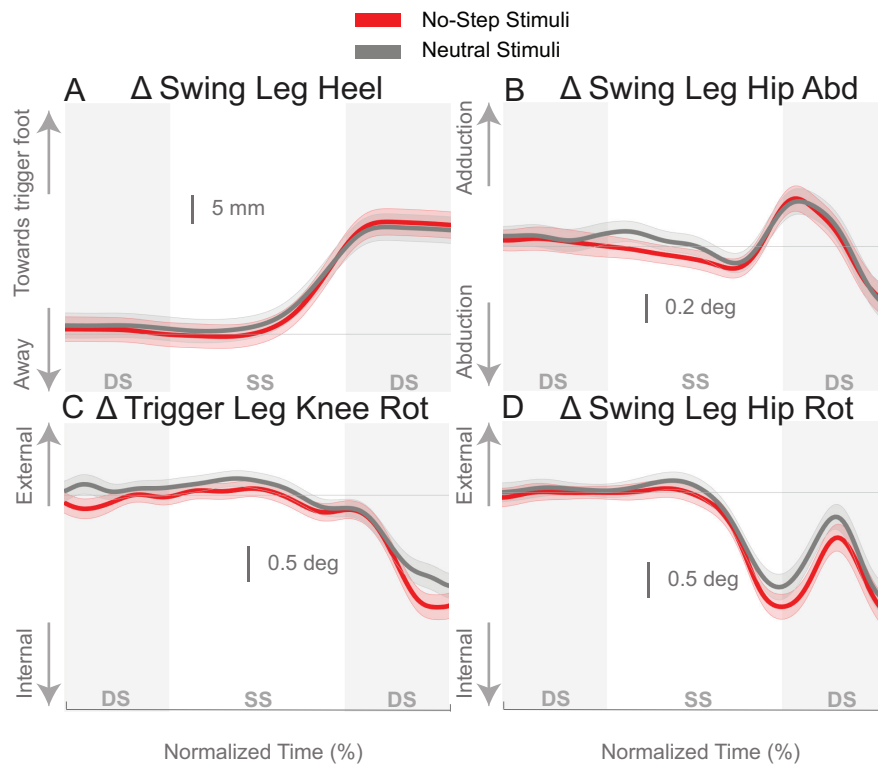

Figure 6: Variables illustrating the use of the change of the foot placement mechanism over time. Changes in response to the balance perturbation in the heel position (A), and joint angles (B,C,D) that contribute to change in heel position. Curves start at the heel strike triggering the stimulus and end at the triggering foot toe-off. Red curves correspond to fall stimuli toward the *No-Step* and gray curves to fall stimuli toward the *Neutral* zone. The vertical shaded areas correspond to double stance, the white area between to single stance. Data shown are changes relative to the unperturbed steps, with shaded areas around the means giving the 95% confidence intervals.

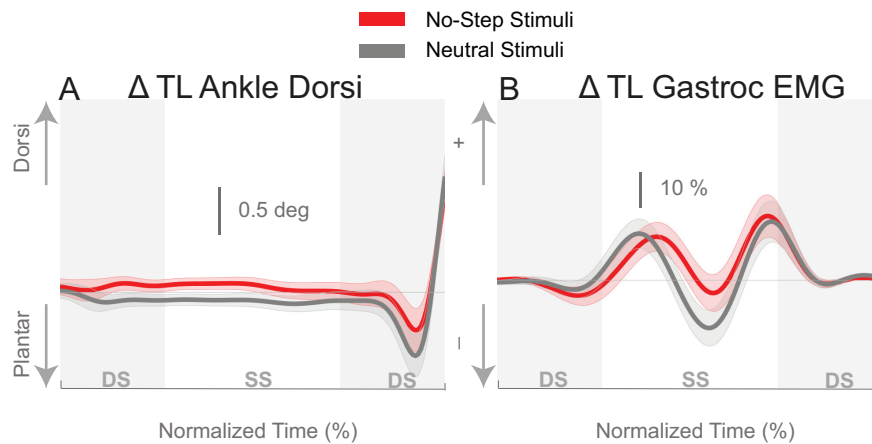

Figure 7: Variables illustrating the use of the push-off mechanism. Changes in response to the balance perturbation in ankle dorsiflexion (A), and the medial gastrocnemius EMG (B). Curves start at the heel strike triggering the stimulus and end at the triggering foot toe-off. Red curves correspond to fall stimuli toward the *No-Step* and gray curves to fall stimuli toward the *Neutral* zone. The vertical shaded areas correspond to double stance, the white area between to single stance. Data shown are changes relative to the unperturbed steps, with shaded areas around the means giving the 95% confidence intervals.

346 **Author contribution statement**

347 TF, FDS, HR, JJ designed the experiment. TF, HR, and SD performed the experiment, TF, HR,  
348 SD analyzed the data. TF, FDS, HR, SD, and JJ wrote the manuscript.

## 349 **References**

- 350 Acasio, J., Wu, M.M., Fey, N.P., Gordon, K.E., 2017. Stability-maneuverability trade-offs during  
351 lateral steps. *Gait and Posture* 52, 171–177. doi:10.1016/j.gaitpost.2016.11.034.
- 352 Adcock, M., Sonder, F., Schättin, A., Gennaro, F., De Bruin, E.D., 2020. A usability study of a  
353 multicomponent video game-based training for older adults. *European Review of Aging and*  
354 *Physical Activity* 17, 1–15. doi:10.1186/s11556-019-0233-2.
- 355 Banala, S.K., Agrawal, S.K., Kim, S.H., Scholz, J.P., 2010. Novel gait adaptation and neuromo-  
356 tor training results using an active leg exoskeleton. *IEEE/ASME Transactions on Mechatron-*  
357 *ics* 15, 216–225. doi:10.1109/TMECH.2010.2041245.
- 358 Bates, D., Machler, M., Bolker, B., Walker, S., 2009. Fitting linear mixed-effects models using  
359 lme4. *Science* 325, 883–885. doi:10.18637/jss.v067.i01.
- 360 Bourdin, P., Martini, M., Sanchez-Vives, M.V., 2019. Altered visual feedback from an embodied  
361 avatar unconsciously influences movement amplitude and muscle activity. *Scientific Reports*  
362 9, 1–9. doi:10.1038/s41598-019-56034-5.
- 363 Bruijn, S.M., Van Dieën, J.H., 2018. Control of human gait stability through foot placement.  
364 *Journal of the Royal Society Interface* 15. doi:10.1098/rsif.2017.0816.
- 365 Davis III, R.B., Öunpuu, S., Tyburski, D., Gage, J.R., 1991. A gait analysis data collec-  
366 tion and reduction technique. *Human Movement Science* 10, 575–587. doi:10.1016/0167-  
367 9457(91)90046-Z.
- 368 Delp, S.L., Anderson, F.C., Arnold, A.S., Loan, P., Habib, A., John, C.T., Guendelman, E.,  
369 Thelen, D.G., 2007. OpenSim: Open-source software to create and analyze dynamic  
370 simulations of movement. *IEEE Transactions on Biomedical Engineering* 54, 1940–1950.  
371 doi:10.1109/TBME.2007.901024.
- 372 Eggenberger, P., Wolf, M., Schumann, M., de Bruin, E.D., 2016. Exergame and balance training



- 373 modulate prefrontal brain activity during walking and enhance executive function in older  
374 adults. *Frontiers in Aging Neuroscience* 8, 1–16. doi:10.3389/fnagi.2016.00066.
- 375 Fai, A.H.T., Cornelius, P.L., 1996. Approximate F-tests of multiple degree of  
376 freedom hypotheses in generalized least squares analyses of unbalanced split-  
377 plot experiments. *Journal of Statistical Computation and Simulation* 54, 363–378.  
378 doi:<https://doi.org/10.1080/00949659608811740>.
- 379 Felsberg, D., Maher, J.P., Rhea, C.K., 2019. The state of behavior change techniques in virtual  
380 reality rehabilitation of neurologic populations: A systematic review. *Frontiers in Psychology*  
381 10. doi:10.3389/fpsyg.2019.00979.
- 382 Ferreira dos Santos, L.L., Christ, O., Mate, K., Schmidt, H., Krüger, J., Dohle, C., Kruger, J.,  
383 Dohle, C., 2015. Movement visualisation in virtual reality rehabilitation of the lower limb:  
384 a systematic review. *Biomedical Engineering OnLine* 15, 76–88. doi:10.1186/s12938-016-  
385 0289-4.
- 386 Fettrow, T., Reimann, H., Grenet, D., Crenshaw, J., Higginson, J., Jeka, J., 2019a. Walking  
387 Cadence Affects the Recruitment of the Medial-Lateral Balance Mechanisms. *Frontiers in*  
388 *Sports and Active Living* 1:40. doi:10.3389/fspor.2019.00040.
- 389 Fettrow, T.D., Reimann, H., Thompson, E.D., Crenshaw, J., Higginson, J., Grenet, D., Jeka,  
390 J., 2019b. Interdependence of balance mechanisms during walking. *PLoS ONE* 14(12).  
391 doi:10.1371/journal.pone.0225902.
- 392 Hof, A.L., Duysens, J., 2013. Responses of human hip abductor muscles to lateral  
393 balance perturbations during walking. *Experimental Brain Research* 230, 301–310.  
394 doi:10.1016/j.humov.2017.11.009.
- 395 Horak, F.B., Diener, H.C., Nashner, L.M., 1989. Influence of central set on human postural  
396 responses. *Journal of Neurophysiology* 62, 841–853. doi:10.1152/jn.1989.62.4.841.

- 397 Jansen, S.E., Toet, A., Werkhoven, P.J., 2011. Human locomotion through a multiple obsta-  
398 cle environment: Strategy changes as a result of visual field limitation. *Experimental Brain*  
399 *Research* 212, 449–456. doi:10.1007/s00221-011-2757-1.
- 400 Kiemel, T., Elahi, A.J., Jeka, J.J., 2008. Identification of the plant for upright stance in humans:  
401 multiple movement patterns from a single neural strategy. *Journal of neurophysiology* 100,  
402 3394–406. doi:10.1152/jn.01272.2007.
- 403 Kuznetsova, A., 2017. ImerTest Package : Tests in Linear Mixed Effects Models. *Journal of*  
404 *Statistical Software* 82, 1–26. doi:10.18637/jss.v082.i13.
- 405 Leavy, B., Byberg, L., Michaëlsson, K., Melhus, H., Åberg, A.C., 2015. The fall descriptions  
406 and health characteristics of older adults with hip fracture: A mixed methods study. *BMC*  
407 *Geriatrics* 15. doi:10.1186/s12877-015-0036-x.
- 408 Matthis, J.S., Fajen, B.R., 2014. Visual control of foot placement when walking over complex  
409 terrain. *Journal of Experimental Psychology: Human Perception and Performance* 40, 106–  
410 115. doi:10.1037/a0033101.
- 411 Otten, E., 1999. Balancing on a narrow ridge: Biomechanics and control. *Philosophical Transac-*  
412 *tions of the Royal Society B: Biological Sciences* 354, 869–875. doi:10.1098/rstb.1999.0439.
- 413 Patla, A., Prentice, S., Robinson, C., Neufield, J., 1991. Visual control of locomotion: strategies  
414 for changing direction and für going over obstacles. *Journal of Experimental Psychology:*  
415 *Human Perception and Performance* 17, 603–634. doi:10.1037//0096-1523.17.3.603.
- 416 Patla, A.E., Greig, M., 2006. Any way you look at it, successful obstacle negotiation needs  
417 visually guided on-line foot placement regulation during the approach phase. *Neuroscience*  
418 *Letters* 397, 110–114. doi:10.1016/j.neulet.2005.12.016.
- 419 Peterka, R.J., 2002. Sensorimotor integration in human postural control. *Journal of neurophys-*  
420 *iology* 88, 1097–1118. doi:10.1152/jn.2002.88.3.1097.

- 421 Peterson, S.M., Ferris, D.P., 2018. Differentiation in Theta and Beta Electro cortical Activity  
422 between Visual and Physical Perturbations to Walking and Standing Balance. *Eneuro* 5,  
423 e0207–18.2018. doi:<http://dx.doi.org/10.1523/ENEURO.0207-18.2018>.
- 424 Raffegeau, T.E., Fawver, B., Clark, M., Engel, B.T., Young, W.R., Williams, A.M., Lohse, K.R.,  
425 Fino, P.C., 2020. The feasibility of using virtual reality to induce mobility-related anxiety during  
426 turning. *Gait and Posture* 77, 6–13. doi:[10.1016/j.gaitpost.2020.01.006](https://doi.org/10.1016/j.gaitpost.2020.01.006).
- 427 Rankin, B.L., Buffo, S.K., Dean, J.C., 2014. A neuromechanical strategy for mediolat-  
428 eral foot placement in walking humans. *Journal of Neurophysiology* 112, 374–383.  
429 doi:[10.1152/jn.00138.2014](https://doi.org/10.1152/jn.00138.2014).
- 430 Reimann, H., Fettrow, T., Grenet, D., Thompson, E.D., Jeka, J.J., 2019. Phase-Dependency  
431 of Medial-Lateral Balance Responses to Sensory Perturbations During Walking. *Frontiers of*  
432 *Sports and Active Living* 1. doi:[10.3389/fspor.2019.00025](https://doi.org/10.3389/fspor.2019.00025).
- 433 Reimann, H., Fettrow, T., Thompson, E.D., Jeka, J.J., 2018. Neural Control of Balance During  
434 Walking. *Frontiers in Physiology* 9, 1271. doi:[10.3389/fphys.2018.01271](https://doi.org/10.3389/fphys.2018.01271).
- 435 Reimann, H., Fettrow, T.D.T., Thompson, E.D.E., Agada, P., McFadyen, B., Jeka, J.J., Mcfadyen,  
436 J., Jeka, J.J., 2017. Complementary mechanisms for upright balance during walking. *PLoS*  
437 *ONE* 12, 1–16. doi:[10.1371/journal.pone.0172215](https://doi.org/10.1371/journal.pone.0172215).
- 438 Rietdyk, S., Rhea, C.K., 2011. The effect of the visual characteristics of obstacles on risk of  
439 tripping and gait parameters during locomotion. *Ophthalmic and Physiological Optics* 31,  
440 302–310. doi:[10.1111/j.1475-1313.2011.00837.x](https://doi.org/10.1111/j.1475-1313.2011.00837.x).
- 441 Schättin, A., Arner, R., Gennaro, F., de Bruin, E.D., 2016. Adaptations of prefrontal  
442 brain activity, executive functions, and gait in healthy elderly following exergame and  
443 balance training: A randomized-controlled study. *Frontiers in Aging Neuroscience* 8.  
444 doi:[10.3389/fnagi.2016.00278](https://doi.org/10.3389/fnagi.2016.00278).
- 445 Seth, A., Hicks, J.L., Uchida, T.K., Habib, A., Dembia, C.L., Dunne, J.J., Ong, C.F., DeMers,  
446 M.S., Rajagopal, A., Millard, M., Hamner, S.R., Arnold, E.M., Yong, J.R., Lakshminanth, S.K.,

- 447 Sherman, M.A., Ku, J.P., Delp, S.L., 2018. OpenSim: Simulating musculoskeletal dynamics  
448 and neuromuscular control to study human and animal movement. PLoS Computational  
449 Biology 14, 1–20. doi:<https://doi.org/10.1371/journal.pcbi.1006223> July.
- 450 Sibley, K.M., Carpenter, M.G., Perry, J.C., Frank, J.S., 2007. Effects of postural anxiety on the  
451 soleus H-reflex. Human Movement Science 26, 103–112. doi:10.1016/j.humov.2006.09.004.
- 452 Townsend, M.a., 1985. Biped gait stabilization via foot placement. Journal of biomechanics 18,  
453 21–38. doi:10.1016/0021-9290(85)90042-9.
- 454 Wang, Y., Srinivasan, M., 2014. Stepping in the direction of the fall : the next foot placement  
455 can be predicted from current upper body state in steady-state walking. Biology Letters 10,  
456 1–5. doi:10.1098/rsbl.2014.0405.
- 457 Winter, D.A., Patla, A.E., Prince, F., Ishac, M., Gielo-perczak, K., Jc, Q., David, A., Patla,  
458 A.E., Prince, F., Ishac, M., 1998. Stiffness Control of Balance in Quiet Standing. Journal of  
459 Physiology 80, 1211–1221. doi:10.1152/jn.1998.80.3.1211.
- 460 Zajac, F.E.F., Topp, E.E.L., Hoy, M.M.G., Rosen, J.J.M., Loan, J.P., Delp, S.L.S., Loan, J.P.,  
461 Hoy, M.M.G., Zajac, F.E.F., Topp, E.E.L., Rosen, J.J.M., 1990. An Interactive Graphics-Based  
462 Model of the Lower Extremity to Study Orthopaedic Surgical Procedures. IEEE Transactions  
463 on Biomedical Engineering 37, 757–767. doi:10.1109/10.102791.
